# Supplementary material for: Comparative effectiveness of larotrectinib versus entrectinib for the treatment of metastatic NTRK gene fusion cancers
Source: Atypon-hosted journal article supplement (doi:10.2217/cer-2021-0247), 2022-08-22
Supplement: supplementary materials (8).docx [file supplementary%20materials%20(8).docx]

**Supplementary Online Content**

**The potential long-term comparative effectiveness of larotrectinib vs. entrectinib for treatment of metastatic NTRK fusion colorectal cancer, soft tissue sarcoma, and baseline brain metastasis**

eFigure 1. One-way sensitivity analysis for larotrectinib vs. entrectinib on QALYs gained in colorectal cancer

eFigure 2. One-way sensitivity analysis for larotrectinib vs. entrectinib on QALYs gained in soft tissue sarcoma

eTable 1. Sensitivity analysis fitting an exponential curve through the median points for progression-free and overall survival for entrectinib

eFigure 1. One-way sensitivity analysis for larotrectinib vs. entrectinib on QALYs gained in colorectal cancer

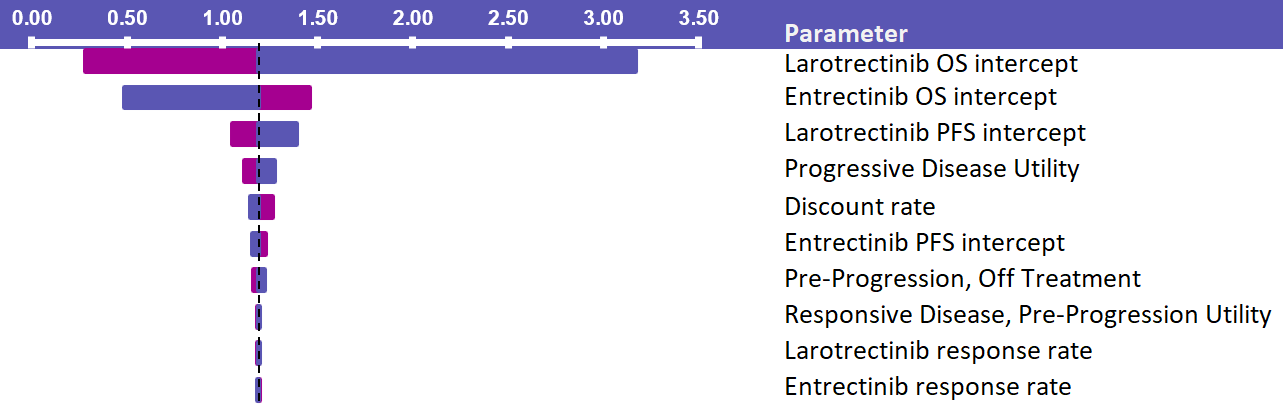


eFigure 2. One-way sensitivity analysis for larotrectinib vs. entrectinib on QALYs gained in soft tissue sarcoma

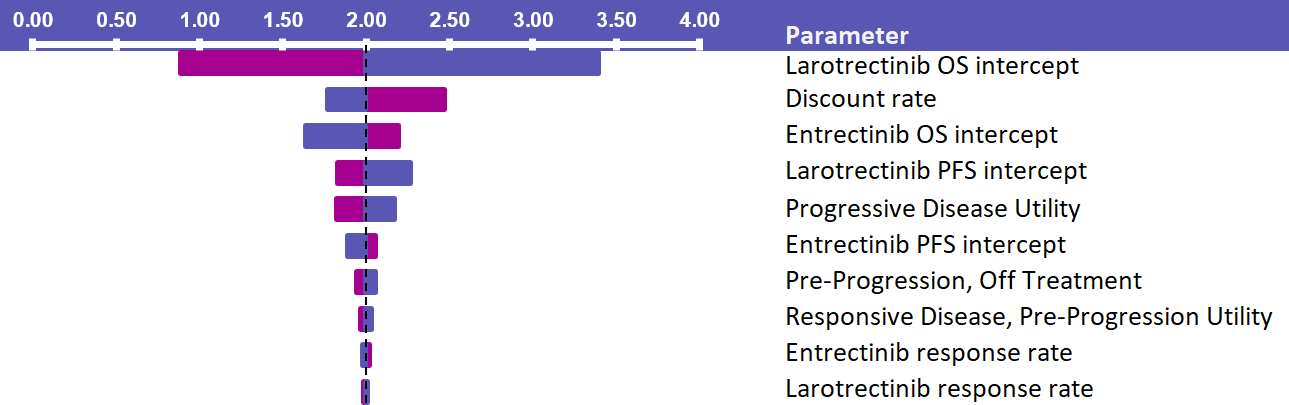


eTable 1. Sensitivity analysis fitting an exponential curve through the median points for progression-free and overall survival for entrectinib

|  | **Colorectal cancer** | **Soft tissue sarcoma** |
| --- | --- | --- |
| Progression-free life-years | 0.29 | 1.19 |
| Post progression life-years | 1.56 | 0.75 |
| Total | 1.85 | 1.93 |
|  |  |  |
| Progression-free QALYs | 0.24 | 0.59 |
| Post progression QALYs | 1.00 | 0.22 |
| Total | 1.24 | 0.82 |

QALY: quality-adjust life-year
